# Supplementary material
Source: PubMed Central journal article supplement (PMC55476)
Supplement: pnas_151263098_1.pdf [file pnas_151263098_1.pdf]

**Table 1. Emission line ratios for transitions among the  $3d^6$  levels of Fe III at  $T_e = 7,000$  K**

| Transition               | Wavelength,<br>Å | Log $N_e$ |         |         |         |         |         |         |         |         |         |         |         |         |
|--------------------------|------------------|-----------|---------|---------|---------|---------|---------|---------|---------|---------|---------|---------|---------|---------|
|                          |                  | 2.0       | 2.5     | 3.0     | 3.5     | 4.0     | 4.5     | 5.0     | 5.5     | 6.0     | 6.5     | 7.0     | 7.5     | 8.0     |
| ${}^3G_4\text{-}{}^5D_4$ | 4,008            | 1.37-02   | 1.44-02 | 1.52-02 | 1.64-02 | 1.83-02 | 2.07-02 | 2.18-02 | 1.92-02 | 1.31-02 | 7.92-03 | 5.30-03 | 4.31-03 | 3.97-03 |
| ${}^3G_3\text{-}{}^5D_3$ | 4,046            | 1.25-03   | 1.38-03 | 1.63-03 | 2.15-03 | 3.08-03 | 4.40-03 | 5.57-03 | 5.56-03 | 4.08-03 | 2.53-03 | 1.70-03 | 1.37-03 | 1.26-03 |
| ${}^3G_5\text{-}{}^5D_4$ | 4,071            | 3.46-03   | 3.55-03 | 3.58-03 | 3.55-03 | 3.47-03 | 3.35-03 | 3.15-03 | 2.73-03 | 1.99-03 | 1.28-03 | 8.96-04 | 7.43-04 | 6.90-04 |
| ${}^3G_4\text{-}{}^5D_3$ | 4,080            | 4.71-03   | 4.96-03 | 5.22-03 | 5.64-03 | 6.31-03 | 7.13-03 | 7.51-03 | 6.60-03 | 4.53-03 | 2.73-03 | 1.83-03 | 1.48-03 | 1.37-03 |
| ${}^3G_3\text{-}{}^5D_2$ | 4,097            | 5.75-04   | 6.32-04 | 7.48-04 | 9.87-04 | 1.41-03 | 2.02-03 | 2.56-03 | 2.55-03 | 1.88-03 | 1.16-03 | 7.80-04 | 6.32-04 | 5.81-04 |
| ${}^3F_3\text{-}{}^5D_4$ | 4,607            | 5.17-02   | 5.19-02 | 5.38-02 | 5.84-02 | 6.71-02 | 7.98-02 | 9.24-02 | 1.00-01 | 9.98-02 | 9.17-02 | 8.24-02 | 7.70-02 | 7.49-02 |
| ${}^3F_4\text{-}{}^5D_4$ | 4,658            | 1.00+00   | 1.00+00 | 1.00+00 | 1.00+00 | 1.00+00 | 1.00+00 | 1.00+00 | 1.00+00 | 1.00+00 | 1.00+00 | 1.00+00 | 1.00+00 | 1.00+00 |
| ${}^3F_2\text{-}{}^5D_3$ | 4,667            | 2.11-02   | 2.10-02 | 2.35-02 | 3.00-02 | 4.19-02 | 5.88-02 | 7.44-02 | 7.93-02 | 6.86-02 | 5.09-02 | 3.87-02 | 3.33-02 | 3.14-02 |
| ${}^3F_3\text{-}{}^5D_3$ | 4,702            | 2.77-01   | 2.78-01 | 2.88-01 | 3.13-01 | 3.60-01 | 4.28-01 | 4.96-01 | 5.37-01 | 5.35-01 | 4.92-01 | 4.42-01 | 4.13-01 | 4.02-01 |
| ${}^3F_2\text{-}{}^5D_2$ | 4,734            | 7.35-02   | 7.31-02 | 8.16-02 | 1.04-01 | 1.46-01 | 2.05-01 | 2.59-01 | 2.76-01 | 2.39-01 | 1.77-01 | 1.35-01 | 1.16-01 | 1.09-01 |
| ${}^3F_4\text{-}{}^5D_3$ | 4,755            | 1.88-01   | 1.87-01 | 1.87-01 | 1.88-01 | 1.88-01 | 1.87-01 | 1.87-01 | 1.88-01 | 1.88-01 | 1.88-01 | 1.87-01 | 1.87-01 | 1.87-01 |
| ${}^3F_3\text{-}{}^5D_2$ | 4,769            | 9.57-02   | 9.62-02 | 9.96-02 | 1.08-01 | 1.24-01 | 1.48-01 | 1.71-01 | 1.86-01 | 1.85-01 | 1.70-01 | 1.53-01 | 1.43-01 | 1.39-01 |
| ${}^3F_2\text{-}{}^5D_1$ | 4,778            | 3.56-02   | 3.53-02 | 3.95-02 | 5.04-02 | 7.06-02 | 9.90-02 | 1.25-01 | 1.33-01 | 1.15-01 | 8.57-02 | 6.51-02 | 5.60-02 | 5.28-02 |
| ${}^3H_4\text{-}{}^5D_4$ | 4,881            | 3.39-01   | 3.78-01 | 4.42-01 | 5.57-01 | 7.09-01 | 8.02-01 | 6.73-01 | 3.78-01 | 1.63-01 | 7.17-02 | 4.09-02 | 3.08-02 | 2.76-02 |
| ${}^3H_5\text{-}{}^5D_4$ | 4,925            | 2.91-02   | 3.01-02 | 2.65-02 | 1.82-02 | 9.39-03 | 4.00-03 | 1.57-03 | 5.90-04 | 2.23-04 | 9.64-05 | 5.53-05 | 4.21-05 | 3.78-05 |
| ${}^3P_0\text{-}{}^5D_1$ | 4,931            | 1.79-02   | 1.75-02 | 2.00-02 | 2.72-02 | 4.19-02 | 6.37-02 | 8.46-02 | 1.01-01 | 1.18-01 | 1.43-01 | 1.72-01 | 1.93-01 | 2.03-01 |
| ${}^3H_6\text{-}{}^5D_4$ | 4,986            | 9.76-01   | 3.98-01 | 1.33-01 | 3.92-02 | 1.11-02 | 3.22-03 | 9.86-04 | 3.20-04 | 1.13-04 | 4.78-05 | 2.74-05 | 2.09-05 | 1.89-05 |
| ${}^3H_4\text{-}{}^5D_3$ | 4,987            | 6.63-02   | 7.38-02 | 8.64-02 | 1.09-01 | 1.38-01 | 1.57-01 | 1.31-01 | 7.39-02 | 3.18-02 | 1.40-02 | 7.98-03 | 6.02-03 | 5.39-03 |
| ${}^3P_1\text{-}{}^5D_2$ | 5,011            | 1.27-01   | 1.20-01 | 1.23-01 | 1.36-01 | 1.64-01 | 2.03-01 | 2.40-01 | 2.71-01 | 3.10-01 | 3.69-01 | 4.41-01 | 4.94-01 | 5.20-01 |
| ${}^3H_5\text{-}{}^5D_3$ | 5,033            | 6.77-03   | 7.01-03 | 6.17-03 | 4.24-03 | 2.19-03 | 9.32-04 | 3.66-04 | 1.38-04 | 5.19-05 | 2.25-05 | 1.29-05 | 9.80-06 | 8.81-06 |
| ${}^3P_1\text{-}{}^5D_0$ | 5,085            | 2.19-02   | 2.07-02 | 2.11-02 | 2.34-02 | 2.81-02 | 3.49-02 | 4.12-02 | 4.66-02 | 5.33-02 | 6.34-02 | 7.56-02 | 8.48-02 | 8.92-02 |
| ${}^3P_2\text{-}{}^5D_3$ | 5,270            | 6.31-01   | 5.89-01 | 5.76-01 | 5.82-01 | 5.97-01 | 6.13-01 | 6.22-01 | 6.36-01 | 6.72-01 | 7.32-01 | 8.00-01 | 8.50-01 | 8.73-01 |
| ${}^3P_2\text{-}{}^5D_1$ | 5,412            | 5.93-02   | 5.54-02 | 5.42-02 | 5.48-02 | 5.62-02 | 5.77-02 | 5.86-02 | 5.99-02 | 6.33-02 | 6.89-02 | 7.53-02 | 8.00-02 | 8.22-02 |
| ${}^3G_3\text{-}{}^3H_4$ | 2.15 $\mu$ m     | 7.01-03   | 7.70-03 | 9.11-03 | 1.20-02 | 1.72-02 | 2.46-02 | 3.12-02 | 3.11-02 | 2.29-02 | 1.41-02 | 9.50-03 | 7.69-03 | 7.08-03 |
| ${}^3G_5\text{-}{}^3H_6$ | 2.22 $\mu$ m     | 6.76-02   | 6.94-02 | 6.99-02 | 6.93-02 | 6.78-02 | 6.55-02 | 6.15-02 | 5.33-02 | 3.89-02 | 2.51-02 | 1.75-02 | 1.45-02 | 1.35-02 |
| ${}^3G_4\text{-}{}^3H_4$ | 2.24 $\mu$ m     | 3.89-02   | 4.09-02 | 4.31-02 | 4.65-02 | 5.21-02 | 5.88-02 | 6.20-02 | 5.45-02 | 3.73-02 | 2.25-02 | 1.51-02 | 1.22-02 | 1.13-02 |
| ${}^3G_5\text{-}{}^3H_5$ | 2.35 $\mu$ m     | 4.49-02   | 4.61-02 | 4.64-02 | 4.60-02 | 4.51-02 | 4.35-02 | 4.09-02 | 3.54-02 | 2.59-02 | 1.67-02 | 1.16-02 | 9.64-03 | 8.95-03 |
| ${}^3G_5\text{-}{}^3H_4$ | 2.45 $\mu$ m     | 6.21-03   | 6.37-03 | 6.41-03 | 6.35-03 | 6.22-03 | 6.01-03 | 5.65-03 | 4.89-03 | 3.57-03 | 2.30-03 | 1.61-03 | 1.33-03 | 1.24-03 |
| ${}^3G_4\text{-}{}^3F_4$ | 2.87 $\mu$ m     | 5.35-03   | 5.63-03 | 5.93-03 | 6.41-03 | 7.16-03 | 8.10-03 | 8.53-03 | 7.50-03 | 5.14-03 | 3.10-03 | 2.07-03 | 1.69-03 | 1.55-03 |
| ${}^3G_3\text{-}{}^3F_3$ | 2.90 $\mu$ m     | 2.25-03   | 2.47-03 | 2.93-03 | 3.86-03 | 5.53-03 | 7.91-03 | 1.00-02 | 9.99-03 | 7.34-03 | 4.54-03 | 3.05-03 | 2.47-03 | 2.27-03 |
| ${}^3G_3\text{-}{}^3F_2$ | 3.04 $\mu$ m     | 1.34-03   | 1.48-03 | 1.75-03 | 2.30-03 | 3.30-03 | 4.72-03 | 5.98-03 | 5.96-03 | 4.38-03 | 2.71-03 | 1.82-03 | 1.47-03 | 1.36-03 |
| ${}^3G_5\text{-}{}^3F_4$ | 3.23 $\mu$ m     | 8.97-03   | 9.21-03 | 9.27-03 | 9.19-03 | 9.00-03 | 8.69-03 | 8.17-03 | 7.07-03 | 5.16-03 | 3.33-03 | 2.33-03 | 1.93-03 | 1.79-03 |
| ${}^5D_3\text{-}{}^5D_4$ | 22.9 $\mu$ m     | 5.05+00   | 4.45+00 | 4.12+00 | 3.79+00 | 3.07+00 | 1.87+00 | 8.14-01 | 2.88-01 | 9.78-02 | 3.65-02 | 1.71-02 | 1.09-02 | 8.88-03 |
| ${}^5D_2\text{-}{}^5D_3$ | 33.0 $\mu$ m     | 1.35+00   | 1.18+00 | 1.09+00 | 9.97-01 | 8.13-01 | 5.11-01 | 2.29-01 | 8.26-02 | 2.83-02 | 1.06-02 | 4.96-03 | 3.16-03 | 2.58-03 |
| ${}^3H_5\text{-}{}^3H_6$ | 40.0 $\mu$ m     | 1.38-02   | 1.42-02 | 1.25-02 | 8.62-03 | 4.45-03 | 1.90-03 | 7.43-04 | 2.80-04 | 1.05-04 | 4.57-05 | 2.62-05 | 1.99-05 | 1.79-05 |
| ${}^5D_0\text{-}{}^5D_1$ | 105.0 $\mu$ m    | 3.39-02   | 2.66-02 | 1.90-02 | 1.16-02 | 6.17-03 | 2.90-03 | 1.13-03 | 3.87-04 | 1.30-04 | 4.85-05 | 2.27-05 | 1.45-05 | 1.19-05 |

Line intensities (in energy units) are given relative to  $I(4,658 \text{ \AA}) = 1.00$ . A + or - B implies  $A \times 10^{\pm B}$ .

**Table 2. Emission line ratios for transitions among the  $3d^6$  levels of Fe III at  $T_e = 10,000\text{K}$** 

| Transition           | Wavelength,<br>Å    | Log $N_e$ |         |         |         |         |         |         |         |         |         |         |         |         |
|----------------------|---------------------|-----------|---------|---------|---------|---------|---------|---------|---------|---------|---------|---------|---------|---------|
|                      |                     | 2.0       | 2.5     | 3.0     | 3.5     | 4.0     | 4.5     | 5.0     | 5.5     | 6.0     | 6.5     | 7.0     | 7.5     | 8.0     |
| $^3G_4\text{-}^5D_4$ | 4,008               | 1.72-02   | 1.82-02 | 1.92-02 | 2.07-02 | 2.31-02 | 2.61-02 | 2.79-02 | 2.53-02 | 1.78-02 | 1.07-02 | 6.92-03 | 5.46-03 | 4.96-03 |
| $^3G_3\text{-}^5D_3$ | 4,046               | 1.60-03   | 1.76-03 | 2.07-03 | 2.72-03 | 3.88-03 | 5.58-03 | 7.19-03 | 7.40-03 | 5.59-03 | 3.45-03 | 2.24-03 | 1.76-03 | 1.60-03 |
| $^3G_5\text{-}^5D_4$ | 4,071               | 4.28-03   | 4.40-03 | 4.43-03 | 4.40-03 | 4.30-03 | 4.14-03 | 3.91-03 | 3.44-03 | 2.58-03 | 1.67-03 | 1.14-03 | 9.17-04 | 8.41-04 |
| $^3G_4\text{-}^5D_3$ | 4,080               | 5.94-03   | 6.27-03 | 6.61-03 | 7.12-03 | 7.95-03 | 9.00-03 | 9.62-03 | 8.70-03 | 6.12-03 | 3.67-03 | 2.38-03 | 1.88-03 | 1.71-03 |
| $^3G_3\text{-}^5D_2$ | 4,097               | 7.35-04   | 8.10-04 | 9.53-04 | 1.25-03 | 1.78-03 | 2.56-03 | 3.30-03 | 3.40-03 | 2.57-03 | 1.59-03 | 1.03-03 | 8.11-04 | 7.35-04 |
| $^3F_3\text{-}^5D_4$ | 4,607               | 5.22-02   | 5.23-02 | 5.41-02 | 5.86-02 | 6.72-02 | 8.00-02 | 9.32-02 | 1.02-01 | 1.03-01 | 9.49-02 | 8.50-02 | 7.88-02 | 7.62-02 |
| $^3F_4\text{-}^5D_4$ | 4,658               | 1.00+00   | 1.00+00 | 1.00+00 | 1.00+00 | 1.00+00 | 1.00+00 | 1.00+00 | 1.00+00 | 1.00+00 | 1.00+00 | 1.00+00 | 1.00+00 | 1.00+00 |
| $^3F_2\text{-}^5D_3$ | 4,667               | 2.25-02   | 2.22-02 | 2.44-02 | 3.06-02 | 4.25-02 | 5.96-02 | 7.61-02 | 8.28-02 | 7.35-02 | 5.50-02 | 4.10-02 | 3.47-02 | 3.23-02 |
| $^3F_3\text{-}^5D_3$ | 4,702               | 2.80-01   | 2.81-01 | 2.90-01 | 3.14-01 | 3.60-01 | 4.29-01 | 5.00-01 | 5.46-01 | 5.50-01 | 5.09-01 | 4.55-01 | 4.22-01 | 4.09-01 |
| $^3F_2\text{-}^5D_2$ | 4,734               | 7.83-02   | 7.71-02 | 8.48-02 | 1.07-01 | 1.48-01 | 2.07-01 | 2.65-01 | 2.88-01 | 2.56-01 | 1.91-01 | 1.43-01 | 1.21-01 | 1.13-01 |
| $^3F_4\text{-}^5D_3$ | 4,755               | 1.88-01   | 1.88-01 | 1.87-01 | 1.87-01 | 1.87-01 | 1.88-01 | 1.88-01 | 1.88-01 | 1.87-01 | 1.88-01 | 1.87-01 | 1.88-01 | 1.87-01 |
| $^3F_3\text{-}^5D_2$ | 4,769               | 9.67-02   | 9.70-02 | 1.00-01 | 1.08-01 | 1.24-01 | 1.48-01 | 1.73-01 | 1.89-01 | 1.90-01 | 1.76-01 | 1.57-01 | 1.46-01 | 1.41-01 |
| $^3F_2\text{-}^5D_1$ | 4,778               | 3.79-02   | 3.73-02 | 4.10-02 | 5.16-02 | 7.15-02 | 1.00-01 | 1.28-01 | 1.39-01 | 1.24-01 | 9.25-02 | 6.91-02 | 5.83-02 | 5.44-02 |
| $^3H_4\text{-}^5D_4$ | 4,881               | 3.83-01   | 4.22-01 | 4.84-01 | 5.95-01 | 7.46-01 | 8.50-01 | 7.33-01 | 4.24-01 | 1.81-01 | 7.65-02 | 4.12-02 | 2.99-02 | 2.63-02 |
| $^3H_5\text{-}^5D_4$ | 4,925               | 2.83-02   | 2.97-02 | 2.67-02 | 1.90-02 | 1.01-02 | 4.36-03 | 1.71-03 | 6.45-04 | 2.40-04 | 1.00-04 | 5.48-05 | 4.02-05 | 3.55-05 |
| $^3P_0\text{-}^5D_1$ | 4,931               | 1.77-02   | 1.72-02 | 1.93-02 | 2.57-02 | 3.91-02 | 5.95-02 | 7.96-02 | 9.58-02 | 1.13-01 | 1.36-01 | 1.65-01 | 1.88-01 | 1.99-01 |
| $^3H_6\text{-}^5D_4$ | 4,986               | 1.04+00   | 4.38-01 | 1.49-01 | 4.42-02 | 1.24-02 | 3.57-03 | 1.08-03 | 3.49-04 | 1.21-04 | 4.90-05 | 2.67-05 | 1.97-05 | 1.75-05 |
| $^3H_4\text{-}^5D_3$ | 4,987               | 7.47-02   | 8.25-02 | 9.46-02 | 1.16-01 | 1.46-01 | 1.66-01 | 1.43-01 | 8.29-02 | 3.54-02 | 1.49-02 | 8.05-03 | 5.84-03 | 5.13-03 |
| $^3P_1\text{-}^5D_2$ | 5,011               | 1.18-01   | 1.11-01 | 1.12-01 | 1.24-01 | 1.49-01 | 1.85-01 | 2.20-01 | 2.50-01 | 2.86-01 | 3.42-01 | 4.11-01 | 4.66-01 | 4.93-01 |
| $^3H_5\text{-}^5D_3$ | 5,033               | 6.60-03   | 6.91-03 | 6.23-03 | 4.43-03 | 2.36-03 | 1.02-03 | 3.99-04 | 1.50-04 | 5.59-05 | 2.34-05 | 1.28-05 | 9.37-06 | 8.28-06 |
| $^3P_1\text{-}^5D_0$ | 5,085               | 2.02-02   | 1.90-02 | 1.93-02 | 2.13-02 | 2.55-02 | 3.17-02 | 3.77-02 | 4.28-02 | 4.91-02 | 5.86-02 | 7.05-02 | 7.99-02 | 8.46-02 |
| $^3P_2\text{-}^5D_3$ | 5,270               | 5.51-01   | 5.14-01 | 5.01-01 | 5.04-01 | 5.15-01 | 5.28-01 | 5.36-01 | 5.49-01 | 5.84-01 | 6.39-01 | 7.00-01 | 7.46-01 | 7.68-01 |
| $^3P_2\text{-}^5D_1$ | 5,412               | 5.18-02   | 4.84-02 | 4.71-02 | 4.74-02 | 4.85-02 | 4.97-02 | 5.05-02 | 5.17-02 | 5.49-02 | 6.01-02 | 6.59-02 | 7.02-02 | 7.22-02 |
| $^3G_3\text{-}^3H_4$ | 2.15 $\mu\text{m}$  | 8.95-03   | 9.87-03 | 1.16-02 | 1.52-02 | 2.17-02 | 3.12-02 | 4.02-02 | 4.14-02 | 3.13-02 | 1.93-02 | 1.26-02 | 9.87-03 | 8.95-03 |
| $^3G_5\text{-}^3H_6$ | 2.22 $\mu\text{m}$  | 8.36-02   | 8.59-02 | 8.66-02 | 8.59-02 | 8.40-02 | 8.10-02 | 7.64-02 | 6.73-02 | 5.04-02 | 3.26-02 | 2.22-02 | 1.79-02 | 1.64-02 |
| $^3G_4\text{-}^3H_4$ | 2.24 $\mu\text{m}$  | 4.90-02   | 5.17-02 | 5.45-02 | 5.87-02 | 6.56-02 | 7.43-02 | 7.94-02 | 7.18-02 | 5.05-02 | 3.03-02 | 1.97-02 | 1.55-02 | 1.41-02 |
| $^3G_5\text{-}^3H_5$ | 2.35 $\mu\text{m}$  | 5.55-02   | 5.71-02 | 5.75-02 | 5.71-02 | 5.58-02 | 5.38-02 | 5.08-02 | 4.47-02 | 3.35-02 | 2.17-02 | 1.47-02 | 1.19-02 | 1.09-02 |
| $^3G_5\text{-}^3H_4$ | 2.45 $\mu\text{m}$  | 7.67-03   | 7.88-03 | 7.95-03 | 7.88-03 | 7.70-03 | 7.43-03 | 7.01-03 | 6.17-03 | 4.63-03 | 2.99-03 | 2.04-03 | 1.64-03 | 1.51-03 |
| $^3G_4\text{-}^3F_4$ | 2.87 $\mu\text{m}$  | 6.74-03   | 7.12-03 | 7.50-03 | 8.08-03 | 9.03-03 | 1.02-02 | 1.09-02 | 9.89-03 | 6.95-03 | 4.17-03 | 2.71-03 | 2.13-03 | 1.94-03 |
| $^3G_3\text{-}^3F_3$ | 2.90 $\mu\text{m}$  | 2.88-03   | 3.17-03 | 3.73-03 | 4.88-03 | 6.98-03 | 1.00-02 | 1.29-02 | 1.33-02 | 1.01-02 | 6.20-03 | 4.03-03 | 3.17-03 | 2.87-03 |
| $^3G_3\text{-}^3F_2$ | 3.04 $\mu\text{m}$  | 1.71-03   | 1.89-03 | 2.22-03 | 2.91-03 | 4.16-03 | 5.98-03 | 7.71-03 | 7.93-03 | 6.00-03 | 3.70-03 | 2.41-03 | 1.89-03 | 1.71-03 |
| $^3G_5\text{-}^3F_4$ | 3.23 $\mu\text{m}$  | 1.11-02   | 1.14-02 | 1.15-02 | 1.14-02 | 1.11-02 | 1.07-02 | 1.01-02 | 8.93-03 | 6.69-03 | 4.33-03 | 2.94-03 | 2.38-03 | 2.18-03 |
| $^5D_3\text{-}^5D_4$ | 22.9 $\mu\text{m}$  | 1.59+00   | 1.40+00 | 1.29+00 | 1.19+00 | 9.72-01 | 6.03-01 | 2.66-01 | 9.44-02 | 3.18-02 | 1.16-02 | 5.17-03 | 3.13-03 | 2.48-03 |
| $^5D_2\text{-}^5D_3$ | 33.0 $\mu\text{m}$  | 4.33-01   | 3.79-01 | 3.47-01 | 3.17-01 | 2.61-01 | 1.66-01 | 7.58-02 | 2.74-02 | 9.33-03 | 3.40-03 | 1.52-03 | 9.26-04 | 7.34-04 |
| $^3H_5\text{-}^3H_6$ | 40.0 $\mu\text{m}$  | 1.34-02   | 1.41-02 | 1.27-02 | 9.01-03 | 4.79-03 | 2.06-03 | 8.11-04 | 3.05-04 | 1.14-04 | 4.75-05 | 2.59-05 | 1.90-05 | 1.68-05 |
| $^5D_0\text{-}^5D_1$ | 105.0 $\mu\text{m}$ | 1.10-02   | 8.66-03 | 6.20-03 | 3.79-03 | 2.03-03 | 9.58-04 | 3.78-04 | 1.30-04 | 4.33-05 | 1.58-05 | 7.08-06 | 4.32-06 | 3.43-06 |

 Line intensities (in energy units) are given relative to  $I(4,658 \text{ \AA}) = 1.00$ . A + or - B implies  $A \times 10^{\pm B}$ .

**Table 3. Emission line ratios for transitions among the  $3d^6$  levels of Fe III at  $T_e = 12,000\text{K}$** 

| Transition                           | Wavelength,<br>Å    | Log $N_e$ |         |         |         |         |         |         |         |         |         |         |         |         |  |
|--------------------------------------|---------------------|-----------|---------|---------|---------|---------|---------|---------|---------|---------|---------|---------|---------|---------|--|
|                                      |                     | 2.0       | 2.5     | 3.0     | 3.5     | 4.0     | 4.5     | 5.0     | 5.5     | 6.0     | 6.5     | 7.0     | 7.5     | 8.0     |  |
| ${}^3\text{G}_4\text{-}^5\text{D}_4$ | 4,008               | 1.89-02   | 2.00-02 | 2.11-02 | 2.27-02 | 2.53-02 | 2.86-02 | 3.08-02 | 2.82-02 | 2.02-02 | 1.21-02 | 7.74-03 | 6.01-03 | 5.41-03 |  |
| ${}^3\text{G}_3\text{-}^5\text{D}_3$ | 4,046               | 1.77-03   | 1.95-03 | 2.29-03 | 2.98-03 | 4.24-03 | 6.10-03 | 7.92-03 | 8.30-03 | 6.38-03 | 3.94-03 | 2.52-03 | 1.95-03 | 1.76-03 |  |
| ${}^3\text{G}_5\text{-}^5\text{D}_4$ | 4,071               | 4.65-03   | 4.78-03 | 4.83-03 | 4.79-03 | 4.68-03 | 4.51-03 | 4.26-03 | 3.78-03 | 2.87-03 | 1.87-03 | 1.25-03 | 9.99-04 | 9.09-04 |  |
| ${}^3\text{G}_4\text{-}^5\text{D}_3$ | 4,080               | 6.51-03   | 6.89-03 | 7.27-03 | 7.82-03 | 8.71-03 | 9.87-03 | 1.06-02 | 9.73-03 | 6.96-03 | 4.18-03 | 2.67-03 | 2.07-03 | 1.86-03 |  |
| ${}^3\text{G}_3\text{-}^5\text{D}_2$ | 4,097               | 8.13-04   | 8.97-04 | 1.05-03 | 1.37-03 | 1.95-03 | 2.80-03 | 3.64-03 | 3.81-03 | 2.93-03 | 1.81-03 | 1.16-03 | 8.98-04 | 8.07-04 |  |
| ${}^3\text{F}_3\text{-}^5\text{D}_4$ | 4,607               | 5.28-02   | 5.28-02 | 5.44-02 | 5.88-02 | 6.74-02 | 8.01-02 | 9.34-02 | 1.03-01 | 1.04-01 | 9.65-02 | 8.62-02 | 7.96-02 | 7.68-02 |  |
| ${}^3\text{F}_4\text{-}^5\text{D}_4$ | 4,658               | 1.00+00   | 1.00+00 | 1.00+00 | 1.00+00 | 1.00+00 | 1.00+00 | 1.00+00 | 1.00+00 | 1.00+00 | 1.00+00 | 1.00+00 | 1.00+00 | 1.00+00 |  |
| ${}^3\text{F}_2\text{-}^5\text{D}_3$ | 4,667               | 2.33-02   | 2.28-02 | 2.49-02 | 3.10-02 | 4.27-02 | 5.98-02 | 7.66-02 | 8.43-02 | 7.59-02 | 5.71-02 | 4.23-02 | 3.53-02 | 3.27-02 |  |
| ${}^3\text{F}_3\text{-}^5\text{D}_3$ | 4,702               | 2.83-01   | 2.83-01 | 2.92-01 | 3.15-01 | 3.61-01 | 4.29-01 | 5.01-01 | 5.50-01 | 5.57-01 | 5.18-01 | 4.62-01 | 4.27-01 | 4.12-01 |  |
| ${}^3\text{F}_2\text{-}^5\text{D}_2$ | 4,734               | 8.11-02   | 7.95-02 | 8.67-02 | 1.08-01 | 1.49-01 | 2.08-01 | 2.67-01 | 2.93-01 | 2.64-01 | 1.99-01 | 1.47-01 | 1.23-01 | 1.14-01 |  |
| ${}^3\text{F}_4\text{-}^5\text{D}_3$ | 4,755               | 1.88-01   | 1.87-01 | 1.88-01 | 1.87-01 | 1.88-01 | 1.88-01 | 1.88-01 | 1.87-01 | 1.87-01 | 1.87-01 | 1.87-01 | 1.87-01 | 1.88-01 |  |
| ${}^3\text{F}_3\text{-}^5\text{D}_2$ | 4,769               | 9.78-02   | 9.77-02 | 1.01-01 | 1.09-01 | 1.25-01 | 1.48-01 | 1.73-01 | 1.90-01 | 1.92-01 | 1.79-01 | 1.60-01 | 1.47-01 | 1.42-01 |  |
| ${}^3\text{F}_2\text{-}^5\text{D}_1$ | 4,778               | 3.92-02   | 3.84-02 | 4.19-02 | 5.21-02 | 7.19-02 | 1.01-01 | 1.29-01 | 1.42-01 | 1.28-01 | 9.61-02 | 7.12-02 | 5.94-02 | 5.51-02 |  |
| ${}^3\text{H}_4\text{-}^5\text{D}_4$ | 4,881               | 4.04-01   | 4.45-01 | 5.06-01 | 6.15-01 | 7.67-01 | 8.76-01 | 7.68-01 | 4.53-01 | 1.94-01 | 8.00-02 | 4.19-02 | 2.97-02 | 2.58-02 |  |
| ${}^3\text{H}_5\text{-}^5\text{D}_4$ | 4,925               | 2.82-02   | 2.97-02 | 2.71-02 | 1.96-02 | 1.06-02 | 4.61-03 | 1.81-03 | 6.82-04 | 2.53-04 | 1.04-04 | 5.53-05 | 3.97-05 | 3.48-05 |  |
| ${}^3\text{P}_0\text{-}^5\text{D}_1$ | 4,931               | 1.77-02   | 1.71-02 | 1.90-02 | 2.51-02 | 3.79-02 | 5.76-02 | 7.74-02 | 9.34-02 | 1.10-01 | 1.33-01 | 1.61-01 | 1.85-01 | 1.97-01 |  |
| ${}^3\text{H}_6\text{-}^5\text{D}_4$ | 4,986               | 1.08+00   | 4.66-01 | 1.60-01 | 4.79-02 | 1.35-02 | 3.84-03 | 1.16-03 | 3.70-04 | 1.27-04 | 5.05-05 | 2.68-05 | 1.93-05 | 1.70-05 |  |
| ${}^3\text{H}_4\text{-}^5\text{D}_3$ | 4,987               | 7.90-02   | 8.70-02 | 9.89-02 | 1.20-01 | 1.50-01 | 1.71-01 | 1.50-01 | 8.85-02 | 3.79-02 | 1.56-02 | 8.18-03 | 5.80-03 | 5.04-03 |  |
| ${}^3\text{P}_1\text{-}^5\text{D}_2$ | 5,011               | 1.14-01   | 1.07-01 | 1.08-01 | 1.19-01 | 1.43-01 | 1.77-01 | 2.11-01 | 2.41-01 | 2.77-01 | 3.30-01 | 3.98-01 | 4.54-01 | 4.83-01 |  |
| ${}^3\text{H}_5\text{-}^5\text{D}_3$ | 5,033               | 6.57-03   | 6.92-03 | 6.31-03 | 4.57-03 | 2.48-03 | 1.07-03 | 4.22-04 | 1.59-04 | 5.90-05 | 2.42-05 | 1.29-05 | 9.26-06 | 8.10-06 |  |
| ${}^3\text{P}_1\text{-}^5\text{D}_0$ | 5,085               | 1.96-02   | 1.84-02 | 1.86-02 | 2.04-02 | 2.45-02 | 3.04-02 | 3.63-02 | 4.13-02 | 4.75-02 | 5.66-02 | 6.83-02 | 7.79-02 | 8.29-02 |  |
| ${}^3\text{P}_2\text{-}^5\text{D}_3$ | 5,270               | 5.24-01   | 4.89-01 | 4.75-01 | 4.77-01 | 4.88-01 | 4.98-01 | 5.06-01 | 5.18-01 | 5.52-01 | 6.05-01 | 6.64-01 | 7.08-01 | 7.30-01 |  |
| ${}^3\text{P}_2\text{-}^5\text{D}_1$ | 5,412               | 4.94-02   | 4.60-02 | 4.48-02 | 4.49-02 | 4.59-02 | 4.69-02 | 4.76-02 | 4.88-02 | 5.19-02 | 5.70-02 | 6.25-02 | 6.67-02 | 6.87-02 |  |
| ${}^3\text{G}_3\text{-}^3\text{H}_4$ | 2.15 $\mu\text{m}$  | 9.91-03   | 1.09-02 | 1.28-02 | 1.67-02 | 2.38-02 | 3.41-02 | 4.43-02 | 4.64-02 | 3.57-02 | 2.21-02 | 1.41-02 | 1.09-02 | 9.83-03 |  |
| ${}^3\text{G}_5\text{-}^3\text{H}_6$ | 2.22 $\mu\text{m}$  | 9.08-02   | 9.35-02 | 9.43-02 | 9.36-02 | 9.14-02 | 8.81-02 | 8.32-02 | 7.38-02 | 5.62-02 | 3.65-02 | 2.45-02 | 1.95-02 | 1.78-02 |  |
| ${}^3\text{G}_4\text{-}^3\text{H}_4$ | 2.24 $\mu\text{m}$  | 5.37-02   | 5.69-02 | 6.00-02 | 6.45-02 | 7.19-02 | 8.14-02 | 8.75-02 | 8.03-02 | 5.74-02 | 3.45-02 | 2.20-02 | 1.71-02 | 1.54-02 |  |
| ${}^3\text{G}_5\text{-}^3\text{H}_5$ | 2.35 $\mu\text{m}$  | 6.03-02   | 6.21-02 | 6.27-02 | 6.21-02 | 6.07-02 | 5.85-02 | 5.53-02 | 4.90-02 | 3.73-02 | 2.42-02 | 1.63-02 | 1.30-02 | 1.18-02 |  |
| ${}^3\text{G}_5\text{-}^3\text{H}_4$ | 2.45 $\mu\text{m}$  | 8.33-03   | 8.58-03 | 8.66-03 | 8.58-03 | 8.39-03 | 8.08-03 | 7.63-03 | 6.77-03 | 5.15-03 | 3.35-03 | 2.25-03 | 1.79-03 | 1.63-03 |  |
| ${}^3\text{G}_4\text{-}^3\text{F}_4$ | 2.87 $\mu\text{m}$  | 7.40-03   | 7.83-03 | 8.25-03 | 8.87-03 | 9.90-03 | 1.12-02 | 1.20-02 | 1.11-02 | 7.90-03 | 4.74-03 | 3.03-03 | 2.35-03 | 2.12-03 |  |
| ${}^3\text{G}_3\text{-}^3\text{F}_3$ | 2.90 $\mu\text{m}$  | 3.18-03   | 3.51-03 | 4.11-03 | 5.36-03 | 7.63-03 | 1.10-02 | 1.42-02 | 1.49-02 | 1.15-02 | 7.08-03 | 4.54-03 | 3.51-03 | 3.16-03 |  |
| ${}^3\text{G}_3\text{-}^3\text{F}_2$ | 3.04 $\mu\text{m}$  | 1.90-03   | 2.09-03 | 2.45-03 | 3.19-03 | 4.55-03 | 6.54-03 | 8.49-03 | 8.89-03 | 6.84-03 | 4.22-03 | 2.71-03 | 2.09-03 | 1.88-03 |  |
| ${}^3\text{G}_5\text{-}^3\text{F}_4$ | 3.23 $\mu\text{m}$  | 1.20-02   | 1.24-02 | 1.25-02 | 1.24-02 | 1.21-02 | 1.17-02 | 1.10-02 | 9.80-03 | 7.45-03 | 4.84-03 | 3.25-03 | 2.59-03 | 2.36-03 |  |
| ${}^5\text{D}_3\text{-}^5\text{D}_4$ | 22.9 $\mu\text{m}$  | 1.03+00   | 9.03-01 | 8.31-01 | 7.66-01 | 6.30-01 | 3.95-01 | 1.76-01 | 6.27-02 | 2.11-02 | 7.56-03 | 3.30-03 | 1.95-03 | 1.51-03 |  |
| ${}^5\text{D}_2\text{-}^5\text{D}_3$ | 33.0 $\mu\text{m}$  | 2.82-01   | 2.47-01 | 2.25-01 | 2.06-01 | 1.70-01 | 1.09-01 | 5.02-02 | 1.82-02 | 6.19-03 | 2.23-03 | 9.78-04 | 5.80-04 | 4.52-04 |  |
| ${}^3\text{H}_5\text{-}^3\text{H}_6$ | 40.0 $\mu\text{m}$  | 1.34-02   | 1.41-02 | 1.28-02 | 9.30-03 | 5.03-03 | 2.18-03 | 8.58-04 | 3.23-04 | 1.20-04 | 4.91-05 | 2.62-05 | 1.88-05 | 1.65-05 |  |
| ${}^5\text{D}_0\text{-}^5\text{D}_1$ | 105.0 $\mu\text{m}$ | 7.19-03   | 5.67-03 | 4.07-03 | 2.49-03 | 1.33-03 | 6.32-04 | 2.50-04 | 8.60-05 | 2.87-05 | 1.03-05 | 4.56-06 | 2.72-06 | 2.12-06 |  |

 Line intensities (in energy units) are given relative to  $I(4,658 \text{ \AA}) = 1.00$ . A + or - B implies  $A \times 10^{\pm B}$ .

**Table 4. Emission line ratios for transitions among the  $3d^6$  levels of Fe III at  $T_e = 15,000\text{K}$** 

| Transition                           | Wavelength,<br>Å    | Log $N_e$ |         |         |         |         |         |         |         |         |         |         |         |         |
|--------------------------------------|---------------------|-----------|---------|---------|---------|---------|---------|---------|---------|---------|---------|---------|---------|---------|
|                                      |                     | 2.0       | 2.5     | 3.0     | 3.5     | 4.0     | 4.5     | 5.0     | 5.5     | 6.0     | 6.5     | 7.0     | 7.5     | 8.0     |
| ${}^3\text{G}_4\text{-}^5\text{D}_4$ | 4,008               | 2.08-02   | 2.20-02 | 2.32-02 | 2.49-02 | 2.77-02 | 3.13-02 | 3.39-02 | 3.17-02 | 2.32-02 | 1.40-02 | 8.74-03 | 6.65-03 | 5.92-03 |
| ${}^3\text{G}_3\text{-}^5\text{D}_3$ | 4,046               | 1.97-03   | 2.17-03 | 2.52-03 | 3.25-03 | 4.60-03 | 6.61-03 | 8.66-03 | 9.29-03 | 7.34-03 | 4.56-03 | 2.87-03 | 2.17-03 | 1.93-03 |
| ${}^3\text{G}_5\text{-}^5\text{D}_4$ | 4,071               | 5.05-03   | 5.21-03 | 5.27-03 | 5.22-03 | 5.10-03 | 4.91-03 | 4.65-03 | 4.16-03 | 3.22-03 | 2.11-03 | 1.40-03 | 1.09-03 | 9.85-04 |
| ${}^3\text{G}_4\text{-}^5\text{D}_3$ | 4,080               | 7.17-03   | 7.60-03 | 8.00-03 | 8.59-03 | 9.55-03 | 1.08-02 | 1.17-02 | 1.09-02 | 7.98-03 | 4.81-03 | 3.01-03 | 2.29-03 | 2.04-03 |
| ${}^3\text{G}_3\text{-}^5\text{D}_2$ | 4,097               | 9.04-04   | 9.97-04 | 1.16-03 | 1.50-03 | 2.12-03 | 3.04-03 | 3.98-03 | 4.27-03 | 3.37-03 | 2.10-03 | 1.32-03 | 9.99-04 | 8.87-04 |
| ${}^3\text{F}_3\text{-}^5\text{D}_4$ | 4,607               | 5.38-02   | 5.35-02 | 5.49-02 | 5.91-02 | 6.75-02 | 8.00-02 | 9.34-02 | 1.03-01 | 1.05-01 | 9.84-02 | 8.78-02 | 8.06-02 | 7.74-02 |
| ${}^3\text{F}_4\text{-}^5\text{D}_4$ | 4,658               | 1.00+00   | 1.00+00 | 1.00+00 | 1.00+00 | 1.00+00 | 1.00+00 | 1.00+00 | 1.00+00 | 1.00+00 | 1.00+00 | 1.00+00 | 1.00+00 | 1.00+00 |
| ${}^3\text{F}_2\text{-}^5\text{D}_3$ | 4,667               | 2.45-02   | 2.38-02 | 2.56-02 | 3.14-02 | 4.28-02 | 5.97-02 | 7.68-02 | 8.57-02 | 7.87-02 | 5.98-02 | 4.39-02 | 3.61-02 | 3.32-02 |
| ${}^3\text{F}_3\text{-}^5\text{D}_3$ | 4,702               | 2.88-01   | 2.87-01 | 2.95-01 | 3.17-01 | 3.62-01 | 4.29-01 | 5.01-01 | 5.53-01 | 5.64-01 | 5.28-01 | 4.71-01 | 4.32-01 | 4.15-01 |
| ${}^3\text{F}_2\text{-}^5\text{D}_2$ | 4,734               | 8.52-02   | 8.29-02 | 8.92-02 | 1.09-01 | 1.49-01 | 2.08-01 | 2.67-01 | 2.99-01 | 2.74-01 | 2.08-01 | 1.53-01 | 1.26-01 | 1.16-01 |
| ${}^3\text{F}_4\text{-}^5\text{D}_3$ | 4,755               | 1.87-01   | 1.87-01 | 1.88-01 | 1.87-01 | 1.88-01 | 1.88-01 | 1.88-01 | 1.87-01 | 1.87-01 | 1.88-01 | 1.88-01 | 1.88-01 | 1.87-01 |
| ${}^3\text{F}_3\text{-}^5\text{D}_2$ | 4,769               | 9.96-02   | 9.92-02 | 1.02-01 | 1.10-01 | 1.25-01 | 1.48-01 | 1.73-01 | 1.91-01 | 1.95-01 | 1.82-01 | 1.63-01 | 1.49-01 | 1.43-01 |
| ${}^3\text{F}_2\text{-}^5\text{D}_1$ | 4,778               | 4.12-02   | 4.91-02 | 4.31-02 | 5.29-02 | 7.21-02 | 1.00-01 | 1.29-01 | 1.44-01 | 1.32-01 | 1.01-01 | 7.39-02 | 6.08-02 | 5.59-02 |
| ${}^3\text{H}_4\text{-}^5\text{D}_4$ | 4,881               | 4.30-01   | 4.72-01 | 5.32-01 | 6.37-01 | 7.89-01 | 9.06-01 | 8.11-01 | 4.92-01 | 2.12-01 | 8.58-02 | 4.32-02 | 2.97-02 | 2.54-02 |
| ${}^3\text{H}_5\text{-}^5\text{D}_4$ | 4,925               | 2.82-02   | 2.99-02 | 2.77-02 | 2.05-02 | 1.14-02 | 5.00-03 | 1.97-03 | 7.41-04 | 2.73-04 | 1.10-04 | 5.65-05 | 3.95-05 | 3.41-05 |
| ${}^3\text{P}_0\text{-}^5\text{D}_1$ | 4,931               | 1.77-02   | 1.71-02 | 1.87-02 | 2.44-02 | 3.65-02 | 5.53-02 | 7.47-02 | 9.08-02 | 1.08-01 | 1.30-01 | 1.58-01 | 1.82-01 | 1.95-01 |
| ${}^3\text{H}_6\text{-}^5\text{D}_4$ | 4,986               | 1.16+00   | 5.10-01 | 1.78-01 | 5.36-02 | 1.50-02 | 4.26-03 | 1.27-03 | 4.04-04 | 1.37-04 | 5.32-05 | 2.72-05 | 1.91-05 | 1.65-05 |
| ${}^3\text{H}_4\text{-}^5\text{D}_3$ | 4,987               | 8.41-02   | 9.22-02 | 1.04-01 | 1.24-01 | 1.54-01 | 1.77-01 | 1.58-01 | 9.61-02 | 4.15-02 | 1.68-02 | 8.44-03 | 5.80-03 | 4.97-03 |
| ${}^3\text{P}_1\text{-}^5\text{D}_2$ | 5,011               | 1.12-01   | 1.05-01 | 1.05-01 | 1.15-01 | 1.37-01 | 1.70-01 | 2.03-01 | 2.32-01 | 2.67-01 | 3.18-01 | 3.84-01 | 4.42-01 | 4.72-01 |
| ${}^3\text{H}_5\text{-}^5\text{D}_3$ | 5,033               | 6.57-03   | 6.96-03 | 6.44-03 | 4.78-03 | 2.65-03 | 1.16-03 | 4.58-04 | 1.73-04 | 6.37-05 | 2.56-05 | 1.32-05 | 9.21-06 | 7.94-06 |
| ${}^3\text{P}_1\text{-}^5\text{D}_0$ | 5,085               | 1.91-02   | 1.79-02 | 1.80-02 | 1.97-02 | 2.35-02 | 2.91-02 | 3.48-02 | 3.98-02 | 4.58-02 | 5.46-02 | 6.59-02 | 7.58-02 | 8.10-02 |
| ${}^3\text{P}_2\text{-}^5\text{D}_3$ | 5,270               | 5.02-01   | 4.68-01 | 4.54-01 | 4.54-01 | 4.63-01 | 4.72-01 | 4.78-01 | 4.89-01 | 5.21-01 | 5.73-01 | 6.29-01 | 6.72-01 | 6.94-01 |
| ${}^3\text{P}_2\text{-}^5\text{D}_1$ | 5,412               | 4.72-02   | 4.40-02 | 4.27-02 | 4.28-02 | 4.35-02 | 4.44-02 | 4.50-02 | 4.60-02 | 4.91-02 | 5.39-02 | 5.92-02 | 6.33-02 | 6.53-02 |
| ${}^3\text{G}_3\text{-}^3\text{H}_4$ | 2.15 $\mu\text{m}$  | 1.10-02   | 1.21-02 | 1.41-02 | 1.82-02 | 2.58-02 | 3.70-02 | 4.85-02 | 5.20-02 | 4.11-02 | 2.55-02 | 1.61-02 | 1.22-02 | 1.08-02 |
| ${}^3\text{G}_5\text{-}^3\text{H}_6$ | 2.22 $\mu\text{m}$  | 9.86-02   | 1.02-01 | 1.03-01 | 1.02-01 | 9.97-02 | 9.60-02 | 9.08-02 | 8.13-02 | 6.30-02 | 4.13-02 | 2.73-02 | 2.14-02 | 1.92-02 |
| ${}^3\text{G}_4\text{-}^3\text{H}_4$ | 2.24 $\mu\text{m}$  | 5.91-02   | 6.27-02 | 6.60-02 | 7.09-02 | 7.87-02 | 8.91-02 | 9.63-02 | 9.00-02 | 6.58-02 | 3.97-02 | 2.49-02 | 1.89-02 | 1.68-02 |
| ${}^3\text{G}_5\text{-}^3\text{H}_5$ | 2.35 $\mu\text{m}$  | 6.55-02   | 6.76-02 | 6.83-02 | 6.78-02 | 6.62-02 | 6.37-02 | 6.03-02 | 5.40-02 | 4.18-02 | 2.74-02 | 1.81-02 | 1.42-02 | 1.28-02 |
| ${}^3\text{G}_5\text{-}^3\text{H}_4$ | 2.45 $\mu\text{m}$  | 9.05-03   | 9.34-03 | 9.44-03 | 9.36-03 | 9.15-03 | 8.80-03 | 8.33-03 | 7.46-03 | 5.78-03 | 3.79-03 | 2.51-03 | 1.96-03 | 1.77-03 |
| ${}^3\text{G}_4\text{-}^3\text{F}_4$ | 2.87 $\mu\text{m}$  | 8.14-03   | 8.63-03 | 9.09-03 | 9.75-03 | 1.08-02 | 1.23-02 | 1.33-02 | 1.24-02 | 9.06-03 | 5.46-03 | 3.42-03 | 2.60-03 | 2.32-03 |
| ${}^3\text{G}_3\text{-}^3\text{F}_3$ | 2.90 $\mu\text{m}$  | 3.54-03   | 3.90-03 | 4.54-03 | 5.85-03 | 8.28-03 | 1.19-02 | 1.56-02 | 1.67-02 | 1.32-02 | 8.19-03 | 5.16-03 | 3.91-03 | 3.47-03 |
| ${}^3\text{G}_3\text{-}^3\text{F}_2$ | 3.04 $\mu\text{m}$  | 2.11-03   | 2.33-03 | 2.71-03 | 3.49-03 | 4.94-03 | 7.09-03 | 9.29-03 | 9.96-03 | 7.87-03 | 4.89-03 | 3.08-03 | 2.33-03 | 2.07-03 |
| ${}^3\text{G}_5\text{-}^3\text{F}_4$ | 3.23 $\mu\text{m}$  | 1.31-02   | 1.35-02 | 1.37-02 | 1.35-02 | 1.32-02 | 1.27-02 | 1.20-02 | 1.08-02 | 8.36-03 | 5.48-03 | 3.63-03 | 2.83-03 | 2.55-03 |
| ${}^5\text{D}_3\text{-}^5\text{D}_4$ | 22.9 $\mu\text{m}$  | 6.70-01   | 5.87-01 | 5.39-01 | 4.97-01 | 4.12-01 | 2.62-01 | 1.19-01 | 4.26-02 | 1.43-02 | 5.06-03 | 2.15-03 | 1.22-03 | 9.30-04 |
| ${}^5\text{D}_2\text{-}^5\text{D}_3$ | 33.0 $\mu\text{m}$  | 1.84-01   | 1.61-01 | 1.46-01 | 1.34-01 | 1.11-01 | 7.21-02 | 3.38-02 | 1.24-02 | 4.20-03 | 1.50-03 | 6.38-04 | 3.66-04 | 2.79-04 |
| ${}^3\text{H}_5\text{-}^3\text{H}_6$ | 40.0 $\mu\text{m}$  | 1.33-02   | 1.42-02 | 1.31-02 | 9.72-03 | 5.39-03 | 2.37-03 | 9.31-04 | 3.51-04 | 1.29-04 | 5.19-05 | 2.67-05 | 1.87-05 | 1.61-05 |
| ${}^5\text{D}_0\text{-}^5\text{D}_1$ | 105.0 $\mu\text{m}$ | 4.72-03   | 3.72-03 | 2.69-03 | 1.65-03 | 8.86-04 | 4.20-04 | 1.68-04 | 5.80-05 | 1.94-05 | 6.91-06 | 2.97-06 | 1.72-06 | 1.32-06 |

Line intensities (in energy units) are given relative to  $I(4,658 \text{ \AA}) = 1.00$ . A + or - B implies  $A \times 10^{\pm B}$ .

**Table 5. Emission line ratios for transitions among the  $3d^6$  levels of Fe III at  $T_e = 20,000\text{K}$**

| Transition                         | Wavelength,<br>Å    | Log $N_e$ |         |         |         |         |         |         |         |         |         |         |         |         |
|------------------------------------|---------------------|-----------|---------|---------|---------|---------|---------|---------|---------|---------|---------|---------|---------|---------|
|                                    |                     | 2.0       | 2.5     | 3.0     | 3.5     | 4.0     | 4.5     | 5.0     | 5.5     | 6.0     | 6.5     | 7.0     | 7.5     | 8.0     |
| $^3\text{G}_4\text{-}^5\text{D}_4$ | 4,008               | 2.28-02   | 2.42-02 | 2.55-02 | 2.73-02 | 3.02-02 | 3.40-02 | 3.71-02 | 3.56-02 | 2.69-02 | 1.64-02 | 1.01-02 | 7.43-03 | 6.50-03 |
| $^3\text{G}_3\text{-}^5\text{D}_3$ | 4,046               | 2.19-03   | 2.41-03 | 2.78-03 | 3.53-03 | 4.94-03 | 7.07-03 | 9.36-03 | 1.04-02 | 8.53-03 | 5.38-03 | 3.32-03 | 2.44-03 | 2.13-03 |
| $^3\text{G}_5\text{-}^5\text{D}_4$ | 4,071               | 5.49-03   | 5.69-03 | 5.76-03 | 5.73-03 | 5.59-03 | 5.38-03 | 5.10-03 | 4.62-03 | 3.66-03 | 2.43-03 | 1.58-03 | 1.21-03 | 1.07-03 |
| $^3\text{G}_4\text{-}^5\text{D}_3$ | 4,080               | 7.86-03   | 8.34-03 | 8.78-03 | 9.39-03 | 1.04-02 | 1.17-02 | 1.28-02 | 1.23-02 | 9.27-03 | 5.66-03 | 3.47-03 | 2.56-03 | 2.24-03 |
| $^3\text{G}_3\text{-}^5\text{D}_2$ | 4,097               | 1.01-03   | 1.11-03 | 1.28-03 | 1.62-03 | 2.27-03 | 3.25-03 | 4.30-03 | 4.77-03 | 3.92-03 | 2.47-03 | 1.52-03 | 1.12-03 | 9.79-04 |
| $^3\text{F}_3\text{-}^5\text{D}_4$ | 4,607               | 5.46-02   | 5.41-02 | 5.52-02 | 5.91-02 | 6.70-02 | 7.91-02 | 9.25-02 | 1.03-01 | 1.07-01 | 1.01-01 | 8.98-02 | 8.18-02 | 7.82-02 |
| $^3\text{F}_4\text{-}^5\text{D}_4$ | 4,658               | 1.00+00   | 1.00+00 | 1.00+00 | 1.00+00 | 1.00+00 | 1.00+00 | 1.00+00 | 1.00+00 | 1.00+00 | 1.00+00 | 1.00+00 | 1.00+00 | 1.00+00 |
| $^3\text{F}_2\text{-}^5\text{D}_3$ | 4,667               | 2.57-02   | 2.48-02 | 2.63-02 | 3.16-02 | 4.24-02 | 5.87-02 | 7.61-02 | 8.67-02 | 8.19-02 | 6.34-02 | 4.61-02 | 3.72-02 | 3.38-02 |
| $^3\text{F}_3\text{-}^5\text{D}_3$ | 4,702               | 2.92-01   | 2.90-01 | 2.96-01 | 3.17-01 | 3.59-01 | 4.24-01 | 4.96-01 | 5.53-01 | 5.71-01 | 5.40-01 | 4.82-01 | 4.39-01 | 4.19-01 |
| $^3\text{F}_2\text{-}^5\text{D}_2$ | 4,734               | 8.96-02   | 8.64-02 | 9.14-02 | 1.10-01 | 1.48-01 | 2.04-01 | 2.65-01 | 3.02-01 | 2.85-01 | 2.21-01 | 1.60-01 | 1.29-01 | 1.18-01 |
| $^3\text{F}_4\text{-}^5\text{D}_3$ | 4,755               | 1.88-01   | 1.88-01 | 1.87-01 | 1.87-01 | 1.88-01 | 1.87-01 | 1.87-01 | 1.88-01 | 1.88-01 | 1.88-01 | 1.87-01 | 1.87-01 | 1.88-01 |
| $^3\text{F}_3\text{-}^5\text{D}_2$ | 4,769               | 1.01-01   | 1.00-01 | 1.02-01 | 1.09-01 | 1.24-01 | 1.46-01 | 1.71-01 | 1.91-01 | 1.97-01 | 1.86-01 | 1.66-01 | 1.52-01 | 1.45-01 |
| $^3\text{F}_2\text{-}^5\text{D}_1$ | 4,778               | 4.33-02   | 4.18-02 | 4.42-02 | 5.31-02 | 7.13-02 | 9.88-02 | 1.28-01 | 1.46-01 | 1.38-01 | 1.07-01 | 7.76-02 | 6.26-02 | 5.68-02 |
| $^3\text{H}_4\text{-}^5\text{D}_4$ | 4,881               | 4.59-01   | 5.02-01 | 5.59-01 | 6.59-01 | 8.10-01 | 9.37-01 | 8.66-01 | 5.49-01 | 2.42-01 | 9.55-02 | 4.57-02 | 3.01-02 | 2.52-02 |
| $^3\text{H}_5\text{-}^5\text{D}_4$ | 4,925               | 2.83-02   | 3.03-02 | 2.85-02 | 2.19-02 | 1.26-02 | 5.62-03 | 2.22-03 | 8.36-04 | 3.07-04 | 1.20-04 | 5.92-05 | 3.98-05 | 3.36-05 |
| $^3\text{P}_0\text{-}^5\text{D}_1$ | 4,931               | 1.76-02   | 1.69-02 | 1.82-02 | 2.33-02 | 3.44-02 | 5.23-02 | 7.14-02 | 8.78-02 | 1.04-01 | 1.26-01 | 1.53-01 | 1.79-01 | 1.93-01 |
| $^3\text{H}_6\text{-}^5\text{D}_4$ | 4,986               | 1.27+00   | 5.79-01 | 2.06-01 | 6.30-02 | 1.77-02 | 4.98-03 | 1.47-03 | 4.62-04 | 1.55-04 | 5.82-05 | 2.84-05 | 1.91-05 | 1.62-05 |
| $^3\text{H}_4\text{-}^5\text{D}_3$ | 4,987               | 8.96-02   | 9.80-02 | 1.09-01 | 1.29-01 | 1.58-01 | 1.83-01 | 1.69-01 | 1.07-01 | 4.73-02 | 1.87-02 | 8.93-03 | 5.88-03 | 4.92-03 |
| $^3\text{P}_1\text{-}^5\text{D}_2$ | 5,011               | 1.09-01   | 1.02-01 | 1.02-01 | 1.10-01 | 1.30-01 | 1.61-01 | 1.93-01 | 2.22-01 | 2.56-01 | 3.05-01 | 3.69-01 | 4.28-01 | 4.61-01 |
| $^3\text{H}_5\text{-}^5\text{D}_3$ | 5,033               | 6.60-03   | 7.05-03 | 6.65-03 | 5.10-03 | 2.93-03 | 1.31-03 | 5.17-04 | 1.95-04 | 7.16-05 | 2.80-05 | 1.38-05 | 9.26-06 | 7.82-06 |
| $^3\text{P}_1\text{-}^5\text{D}_0$ | 5,085               | 1.87-02   | 1.75-02 | 1.74-02 | 1.89-02 | 2.23-02 | 2.76-02 | 3.32-02 | 3.81-02 | 4.40-02 | 5.23-02 | 6.33-02 | 7.34-02 | 7.91-02 |
| $^3\text{P}_2\text{-}^5\text{D}_3$ | 5,270               | 4.95-01   | 4.61-01 | 4.45-01 | 4.44-01 | 4.49-01 | 4.56-01 | 4.60-01 | 4.68-01 | 4.97-01 | 5.46-01 | 5.98-01 | 6.39-01 | 6.60-01 |
| $^3\text{P}_2\text{-}^5\text{D}_1$ | 5,412               | 4.66-02   | 4.34-02 | 4.19-02 | 4.17-02 | 4.23-02 | 4.29-02 | 4.33-02 | 4.41-02 | 4.68-02 | 5.14-02 | 5.63-02 | 6.01-02 | 6.22-02 |
| $^3\text{G}_3\text{-}^3\text{H}_4$ | 2.15 $\mu\text{m}$  | 1.23-02   | 1.35-02 | 1.55-02 | 1.97-02 | 2.76-02 | 3.96-02 | 5.24-02 | 5.80-02 | 4.78-02 | 3.01-02 | 1.86-02 | 1.37-02 | 1.19-02 |
| $^3\text{G}_5\text{-}^3\text{H}_6$ | 2.22 $\mu\text{m}$  | 1.07-01   | 1.11-01 | 1.13-01 | 1.12-01 | 1.09-01 | 1.05-01 | 9.96-02 | 9.02-02 | 7.16-02 | 4.76-02 | 3.10-02 | 2.36-02 | 2.09-02 |
| $^3\text{G}_4\text{-}^3\text{H}_4$ | 2.24 $\mu\text{m}$  | 6.48-02   | 6.88-02 | 7.25-02 | 7.75-02 | 8.57-02 | 9.68-02 | 1.05-01 | 1.01-01 | 7.65-02 | 4.67-02 | 2.86-02 | 2.11-02 | 1.85-02 |
| $^3\text{G}_5\text{-}^3\text{H}_5$ | 2.35 $\mu\text{m}$  | 7.13-02   | 7.38-02 | 7.48-02 | 7.43-02 | 7.26-02 | 6.98-02 | 6.61-02 | 5.99-02 | 4.75-02 | 3.16-02 | 2.06-02 | 1.57-02 | 1.39-02 |
| $^3\text{G}_5\text{-}^3\text{H}_4$ | 2.45 $\mu\text{m}$  | 9.85-03   | 1.02-02 | 1.03-02 | 1.03-02 | 1.00-02 | 9.64-03 | 9.13-03 | 8.28-03 | 6.57-03 | 4.37-03 | 2.84-03 | 2.16-03 | 1.92-03 |
| $^3\text{G}_4\text{-}^3\text{F}_3$ | 2.87 $\mu\text{m}$  | 8.92-03   | 9.48-03 | 9.98-03 | 1.07-02 | 1.18-02 | 1.33-02 | 1.45-02 | 1.39-02 | 1.05-02 | 6.43-03 | 3.94-03 | 2.91-03 | 2.55-03 |
| $^3\text{G}_3\text{-}^3\text{F}_3$ | 2.90 $\mu\text{m}$  | 3.94-03   | 4.34-03 | 4.99-03 | 6.34-03 | 8.88-03 | 1.27-02 | 1.68-02 | 1.86-02 | 1.53-02 | 9.68-03 | 5.97-03 | 4.39-03 | 3.83-03 |
| $^3\text{G}_3\text{-}^3\text{F}_2$ | 3.04 $\mu\text{m}$  | 2.35-03   | 2.59-03 | 2.98-03 | 3.78-03 | 5.29-03 | 7.58-03 | 1.00-02 | 1.11-02 | 9.15-03 | 5.77-03 | 3.56-03 | 2.62-03 | 2.29-03 |
| $^3\text{G}_5\text{-}^3\text{F}_4$ | 3.23 $\mu\text{m}$  | 1.42-02   | 1.47-02 | 1.49-02 | 1.48-02 | 1.45-02 | 1.39-02 | 1.32-02 | 1.20-02 | 9.50-03 | 6.31-03 | 4.11-03 | 3.13-03 | 2.78-03 |
| $^5\text{D}_3\text{-}^5\text{D}_4$ | 22.9 $\mu\text{m}$  | 4.36-01   | 3.82-01 | 3.49-01 | 3.23-01 | 2.71-01 | 1.77-01 | 8.25-02 | 3.00-02 | 1.01-02 | 3.51-03 | 1.44-03 | 7.84-04 | 5.76-04 |
| $^5\text{D}_2\text{-}^5\text{D}_3$ | 33.0 $\mu\text{m}$  | 1.20-01   | 1.05-01 | 9.46-02 | 8.65-02 | 7.25-02 | 4.83-02 | 2.32-02 | 8.67-03 | 2.95-03 | 1.04-03 | 4.28-04 | 2.35-04 | 1.74-04 |
| $^3\text{H}_5\text{-}^3\text{H}_6$ | 40.0 $\mu\text{m}$  | 1.34-02   | 1.43-02 | 1.35-02 | 1.04-02 | 5.95-03 | 2.66-03 | 1.05-03 | 3.96-04 | 1.46-04 | 5.70-05 | 2.80-05 | 1.88-05 | 1.59-05 |
| $^5\text{D}_0\text{-}^5\text{D}_1$ | 105.0 $\mu\text{m}$ | 3.05-03   | 2.42-03 | 1.76-03 | 1.09-03 | 5.89-04 | 2.82-04 | 1.14-04 | 4.00-05 | 1.34-05 | 4.74-06 | 1.98-06 | 1.11-06 | 8.25-07 |

Line intensities (in energy units) are given relative to  $I(4,658 \text{ \AA}) = 1.00$ . A + or - B implies  $A \times 10^{\pm B}$ .

**Table 6. Emission line ratios for transitions among the  $3d^2$  levels of Fe VII at  $T_e = 10,000\text{K}$**

| Transition                         | Wavelength,<br>Å   | Log $N_e$ |         |         |         |         |         |         |         |         |         |         |         |         |
|------------------------------------|--------------------|-----------|---------|---------|---------|---------|---------|---------|---------|---------|---------|---------|---------|---------|
|                                    |                    | 2.0       | 2.5     | 3.0     | 3.5     | 4.0     | 4.5     | 5.0     | 5.5     | 6.0     | 6.5     | 7.0     | 7.5     | 8.0     |
| $^1\text{S}_0\text{-}^1\text{D}_2$ | 2,015              | 2.71-04   | 2.48-04 | 2.41-04 | 2.24-04 | 2.62-04 | 2.62-04 | 2.44-04 | 2.70-04 | 2.91-04 | 3.29-04 | 4.49-04 | 7.18-04 | 1.33-03 |
| $^1\text{G}_4\text{-}^3\text{F}_3$ | 3,587              | 9.46-02   | 9.46-02 | 9.46-02 | 9.46-02 | 9.47-02 | 9.50-02 | 9.56-02 | 9.69-02 | 9.83-02 | 9.75-02 | 8.94-02 | 7.55-02 | 6.53-02 |
| $^1\text{G}_4\text{-}^3\text{F}_4$ | 3,759              | 1.32-01   | 1.32-01 | 1.32-01 | 1.32-01 | 1.33-01 | 1.33-01 | 1.34-01 | 1.36-01 | 1.38-01 | 1.36-01 | 1.25-01 | 1.06-01 | 9.13-02 |
| $^3\text{P}_2\text{-}^3\text{F}_2$ | 4,699              | 9.01-02   | 9.02-02 | 9.03-02 | 9.09-02 | 9.25-02 | 9.71-02 | 1.08-01 | 1.26-01 | 1.36-01 | 1.24-01 | 9.09-02 | 6.10-02 | 4.61-02 |
| $^3\text{P}_1\text{-}^3\text{F}_2$ | 4,893              | 1.04-01   | 1.04-01 | 1.04-01 | 1.03-01 | 1.03-01 | 1.01-01 | 9.56-02 | 8.34-02 | 6.33-02 | 4.00-02 | 2.21-02 | 1.27-02 | 8.99-03 |
| $^3\text{P}_2\text{-}^3\text{F}_3$ | 4,942              | 3.43-02   | 3.43-02 | 3.44-02 | 3.46-02 | 3.52-02 | 3.70-02 | 4.12-02 | 4.79-02 | 5.19-02 | 4.73-02 | 3.46-02 | 2.32-02 | 1.75-02 |
| $^3\text{P}_0\text{-}^3\text{F}_2$ | 4,989              | 1.86-01   | 1.85-01 | 1.85-01 | 1.84-01 | 1.81-01 | 1.72-01 | 1.50-01 | 1.13-01 | 7.36-02 | 4.15-02 | 2.15-02 | 1.20-02 | 8.41-03 |
| $^3\text{P}_1\text{-}^3\text{F}_3$ | 5,159              | 1.49-01   | 1.49-01 | 1.49-01 | 1.49-01 | 1.48-01 | 1.45-01 | 1.38-01 | 1.20-01 | 9.11-02 | 5.76-02 | 3.18-02 | 1.83-02 | 1.29-02 |
| $^3\text{P}_2\text{-}^3\text{F}_4$ | 5,276              | 3.39-02   | 3.39-02 | 3.40-02 | 3.42-02 | 3.48-02 | 3.65-02 | 4.07-02 | 4.73-02 | 5.13-02 | 4.67-02 | 3.42-02 | 2.29-02 | 1.73-02 |
| $^1\text{D}_2\text{-}^3\text{F}_2$ | 5,721              | 1.00+00   | 1.00+00 | 1.00+00 | 1.00+00 | 1.00+00 | 1.00+00 | 1.00+00 | 1.00+00 | 1.00+00 | 1.00+00 | 1.00+00 | 1.00+00 | 1.00+00 |
| $^1\text{D}_2\text{-}^3\text{F}_3$ | 6,087              | 1.74-01   | 1.74-01 | 1.74-01 | 1.74-01 | 1.74-01 | 1.74-01 | 1.74-01 | 1.74-01 | 1.74-01 | 1.74-01 | 1.74-01 | 1.74-01 | 1.74-01 |
| $^1\text{D}_2\text{-}^3\text{F}_4$ | 6,601              | 3.71-04   | 3.71-04 | 3.71-04 | 3.71-04 | 3.71-04 | 3.71-04 | 3.71-04 | 3.71-04 | 3.71-04 | 3.71-04 | 3.71-04 | 3.71-04 | 3.71-04 |
| $^3\text{P}_2\text{-}^1\text{D}_2$ | 2.63 $\mu\text{m}$ | 1.77-02   | 1.77-02 | 1.77-02 | 1.78-02 | 1.81-02 | 1.91-02 | 2.12-02 | 2.47-02 | 2.68-02 | 2.44-02 | 1.78-02 | 1.20-02 | 9.04-03 |
| $^3\text{P}_1\text{-}^1\text{D}_2$ | 3.39 $\mu\text{m}$ | 1.71-02   | 1.71-02 | 1.71-02 | 1.70-02 | 1.69-02 | 1.66-02 | 1.58-02 | 1.37-02 | 1.04-02 | 6.60-03 | 3.64-03 | 2.10-03 | 1.48-03 |
| $^3\text{F}_4\text{-}^3\text{F}_3$ | 7.81 $\mu\text{m}$ | 8.89-01   | 8.90-01 | 8.91-01 | 8.95-01 | 9.06-01 | 9.30-01 | 9.34-01 | 7.75-01 | 4.43-01 | 1.91-01 | 7.75-02 | 3.66-02 | 2.31-02 |
| $^3\text{F}_3\text{-}^3\text{F}_2$ | 9.51 $\mu\text{m}$ | 3.15+00   | 3.15+00 | 3.13+00 | 3.10+00 | 2.99+00 | 2.67+00 | 1.98+00 | 1.03+00 | 3.76-01 | 1.24-01 | 4.50-02 | 2.03-02 | 1.25-02 |

Line intensities (in energy units) are given relative to  $I(5,721 \text{ \AA}) = 1.00$ . A + or - B implies  $A \times 10^{\pm B}$ .

**Table 7. Emission line ratios for transitions among the  $3d^2$  levels of Fe VII at  $T_e = 15,000\text{K}$** 

| Transition    | Wavelength,<br>Å   | Log $N_e$ |         |         |         |         |         |         |         |         |         |         |         |         |
|---------------|--------------------|-----------|---------|---------|---------|---------|---------|---------|---------|---------|---------|---------|---------|---------|
|               |                    | 2.0       | 2.5     | 3.0     | 3.5     | 4.0     | 4.5     | 5.0     | 5.5     | 6.0     | 6.5     | 7.0     | 7.5     | 8.0     |
| $^1S_0-^1D_2$ | 2,015              | 2.45-03   | 2.45-03 | 2.45-03 | 2.46-03 | 2.45-03 | 2.46-03 | 2.50-03 | 2.56-03 | 2.75-03 | 3.21-03 | 4.29-03 | 6.85-03 | 1.27-02 |
| $^1G_4-^3F_3$ | 3,587              | 1.89-01   | 1.89-01 | 1.89-01 | 1.89-01 | 1.89-01 | 1.90-01 | 1.90-01 | 1.91-01 | 1.92-01 | 1.88-01 | 1.71-01 | 1.40-01 | 1.17-01 |
| $^1G_4-^3F_4$ | 3,759              | 2.65-01   | 2.65-01 | 2.65-01 | 2.65-01 | 2.65-01 | 2.65-01 | 2.66-01 | 2.67-01 | 2.68-01 | 2.64-01 | 2.39-01 | 1.96-01 | 1.64-01 |
| $^3P_2-^3F_2$ | 4,699              | 1.19-01   | 1.19-01 | 1.19-01 | 1.20-01 | 1.21-01 | 1.25-01 | 1.36-01 | 1.55-01 | 1.69-01 | 1.58-01 | 1.18-01 | 7.83-02 | 5.73-02 |
| $^3P_1-^3F_2$ | 4,893              | 1.26-01   | 1.26-01 | 1.26-01 | 1.26-01 | 1.25-01 | 1.23-01 | 1.18-01 | 1.04-01 | 8.04-02 | 5.17-02 | 2.86-02 | 1.60-02 | 1.08-02 |
| $^3P_2-^3F_3$ | 4,942              | 4.53-02   | 4.53-02 | 4.54-02 | 4.56-02 | 4.61-02 | 4.77-02 | 5.17-02 | 5.88-02 | 6.43-02 | 6.01-02 | 4.49-02 | 2.98-02 | 2.18-02 |
| $^3P_0-^3F_2$ | 4,989              | 2.24-01   | 2.23-01 | 2.23-01 | 2.22-01 | 2.19-01 | 2.10-01 | 1.87-01 | 1.45-01 | 9.55-02 | 5.39-02 | 2.76-02 | 1.49-02 | 9.96-03 |
| $^3P_1-^3F_3$ | 5,159              | 1.81-01   | 1.81-01 | 1.81-01 | 1.81-01 | 1.80-01 | 1.77-01 | 1.69-01 | 1.50-01 | 1.16-01 | 7.45-02 | 4.11-02 | 2.30-02 | 1.56-02 |
| $^3P_2-^3F_4$ | 5,276              | 4.48-02   | 4.48-02 | 4.48-02 | 4.50-02 | 4.55-02 | 4.71-02 | 5.11-02 | 5.81-02 | 6.35-02 | 5.93-02 | 4.44-02 | 2.95-02 | 2.16-02 |
| $^1D_2-^3F_2$ | 5,721              | 1.00+00   | 1.00+00 | 1.00+00 | 1.00+00 | 1.00+00 | 1.00+00 | 1.00+00 | 1.00+00 | 1.00+00 | 1.00+00 | 1.00+00 | 1.00+00 | 1.00+00 |
| $^1D_2-^3F_3$ | 6,087              | 1.74-01   | 1.74-01 | 1.74-01 | 1.74-01 | 1.74-01 | 1.74-01 | 1.74-01 | 1.74-01 | 1.74-01 | 1.74-01 | 1.74-01 | 1.74-01 | 1.74-01 |
| $^1D_2-^3F_4$ | 6,601              | 3.71-04   | 3.71-04 | 3.71-04 | 3.71-04 | 3.71-04 | 3.71-04 | 3.71-04 | 3.71-04 | 3.71-04 | 3.71-04 | 3.71-04 | 3.71-04 | 3.71-04 |
| $^3P_2-^1D_2$ | 2.63 $\mu\text{m}$ | 2.33-02   | 2.33-02 | 2.34-02 | 2.35-02 | 2.37-02 | 2.46-02 | 2.66-02 | 3.03-02 | 3.31-02 | 3.09-02 | 2.32-02 | 1.54-02 | 1.12-02 |
| $^3P_1-^1D_2$ | 3.39 $\mu\text{m}$ | 2.08-02   | 2.08-02 | 2.08-02 | 2.07-02 | 2.06-02 | 2.03-02 | 1.94-02 | 1.71-02 | 1.33-02 | 8.52-03 | 4.71-03 | 2.63-03 | 1.78-03 |
| $^3F_4-^3F_3$ | 7.81 $\mu\text{m}$ | 4.09-01   | 4.10-01 | 4.10-01 | 4.11-01 | 4.16-01 | 4.25-01 | 4.31-01 | 3.78-01 | 2.33-01 | 1.05-01 | 4.27-02 | 1.95-02 | 1.17-02 |
| $^3F_3-^3F_2$ | 9.51 $\mu\text{m}$ | 1.39+00   | 1.39+00 | 1.38+00 | 1.37+00 | 1.33+00 | 1.22+00 | 9.51-01 | 5.36-01 | 2.08-01 | 6.88-02 | 2.42-02 | 1.04-02 | 6.05-03 |

Line intensities (in energy units) are given relative to  $I(5,721 \text{ \AA}) = 1.00$ . A + or - B implies  $A \times 10^{\pm B}$ .

**Table 8. Emission line ratios for transitions among the  $3d^2$  levels of Fe VII at  $T_e = 20,000\text{K}$** 

| Transition    | Wavelength,<br>Å   | Log $N_e$ |         |         |         |         |         |         |         |         |         |         |         |         |
|---------------|--------------------|-----------|---------|---------|---------|---------|---------|---------|---------|---------|---------|---------|---------|---------|
|               |                    | 2.0       | 2.5     | 3.0     | 3.5     | 4.0     | 4.5     | 5.0     | 5.5     | 6.0     | 6.5     | 7.0     | 7.5     | 8.0     |
| $^1S_0-^1D_2$ | 2,015              | 7.39-03   | 7.39-03 | 7.39-03 | 7.38-03 | 7.39-03 | 7.41-03 | 7.47-03 | 7.66-03 | 8.21-03 | 9.62-03 | 1.29-02 | 2.04-02 | 3.76-02 |
| $^1G_4-^3F_3$ | 3,587              | 2.89-01   | 2.89-01 | 2.89-01 | 2.89-01 | 2.89-01 | 2.89-01 | 2.88-01 | 2.87-01 | 2.85-01 | 2.78-01 | 2.48-01 | 1.98-01 | 1.60-01 |
| $^1G_4-^3F_4$ | 3,759              | 4.05-01   | 4.05-01 | 4.05-01 | 4.05-01 | 4.05-01 | 4.04-01 | 4.03-01 | 4.02-01 | 3.99-01 | 3.89-01 | 3.47-01 | 2.78-01 | 2.24-01 |
| $^3P_2-^3F_2$ | 4,699              | 1.45-01   | 1.45-01 | 1.45-01 | 1.46-01 | 1.47-01 | 1.50-01 | 1.60-01 | 1.78-01 | 1.94-01 | 1.84-01 | 1.39-01 | 9.13-02 | 6.49-02 |
| $^3P_1-^3F_2$ | 4,893              | 1.45-01   | 1.45-01 | 1.45-01 | 1.45-01 | 1.44-01 | 1.42-01 | 1.36-01 | 1.21-01 | 9.49-02 | 6.15-02 | 3.39-02 | 1.85-02 | 1.21-02 |
| $^3P_2-^3F_3$ | 4,942              | 5.53-02   | 5.53-02 | 5.54-02 | 5.55-02 | 5.59-02 | 5.73-02 | 6.09-02 | 6.78-02 | 7.39-02 | 6.99-02 | 5.30-02 | 3.47-02 | 2.47-02 |
| $^3P_0-^3F_2$ | 4,989              | 2.56-01   | 2.56-01 | 2.56-01 | 2.55-01 | 2.52-01 | 2.43-01 | 2.20-01 | 1.74-01 | 1.15-01 | 6.49-02 | 3.28-02 | 1.72-02 | 1.10-02 |
| $^3P_1-^3F_3$ | 5,159              | 2.09-01   | 2.09-01 | 2.09-01 | 2.08-01 | 2.07-01 | 2.04-01 | 1.96-01 | 1.75-01 | 1.37-01 | 8.86-02 | 4.88-02 | 2.66-02 | 1.74-02 |
| $^3P_2-^3F_4$ | 5,276              | 5.46-02   | 5.47-02 | 5.47-02 | 5.48-02 | 5.53-02 | 5.66-02 | 6.02-02 | 6.70-02 | 7.30-02 | 6.91-02 | 5.23-02 | 3.43-02 | 2.44-02 |
| $^1D_2-^3F_2$ | 5,721              | 1.00+00   | 1.00+00 | 1.00+00 | 1.00+00 | 1.00+00 | 1.00+00 | 1.00+00 | 1.00+00 | 1.00+00 | 1.00+00 | 1.00+00 | 1.00+00 | 1.00+00 |
| $^1D_2-^3F_3$ | 6,087              | 1.74-01   | 1.74-01 | 1.74-01 | 1.74-01 | 1.74-01 | 1.74-01 | 1.74-01 | 1.74-01 | 1.74-01 | 1.74-01 | 1.74-01 | 1.74-01 | 1.74-01 |
| $^1D_2-^3F_4$ | 6,601              | 3.70-04   | 3.71-04 | 3.71-04 | 3.70-04 | 3.71-04 | 3.71-04 | 3.71-04 | 3.71-04 | 3.71-04 | 3.71-04 | 3.71-04 | 3.71-04 | 3.71-04 |
| $^3P_2-^1D_2$ | 2.63 $\mu\text{m}$ | 2.85-02   | 2.85-02 | 2.85-02 | 2.86-02 | 2.88-02 | 2.95-02 | 3.14-02 | 3.49-02 | 3.81-02 | 3.60-02 | 2.73-02 | 1.79-02 | 1.27-02 |
| $^3P_1-^1D_2$ | 3.39 $\mu\text{m}$ | 2.39-02   | 2.39-02 | 2.39-02 | 2.38-02 | 2.37-02 | 2.34-02 | 2.24-02 | 2.00-02 | 1.56-02 | 1.01-02 | 5.58-03 | 3.04-03 | 1.99-03 |
| $^3F_4-^3F_3$ | 7.81 $\mu\text{m}$ | 2.78-01   | 2.78-01 | 2.78-01 | 2.79-01 | 2.81-01 | 2.86-01 | 2.91-01 | 2.63-01 | 1.72-01 | 8.04-02 | 3.28-02 | 1.46-02 | 8.47-03 |
| $^3F_3-^3F_2$ | 9.51 $\mu\text{m}$ | 9.19-01   | 9.19-01 | 9.17-01 | 9.09-01 | 8.87-01 | 8.24-01 | 6.66-01 | 3.99-01 | 1.62-01 | 5.43-02 | 1.87-02 | 7.72-03 | 4.30-03 |

Line intensities (in energy units) are given relative to  $I(5,721 \text{ \AA}) = 1.00$ . A + or - B implies  $A \times 10^{\pm B}$ .

**Table 9. Emission line ratios for transitions among the  $3d^2$  levels of Fe VII at  $T_e = 25,000\text{K}$** 

| Transition    | Wavelength,<br>Å   | Log $N_e$ |         |         |         |         |         |         |         |         |         |         |         |         |
|---------------|--------------------|-----------|---------|---------|---------|---------|---------|---------|---------|---------|---------|---------|---------|---------|
|               |                    | 2.0       | 2.5     | 3.0     | 3.5     | 4.0     | 4.5     | 5.0     | 5.5     | 6.0     | 6.5     | 7.0     | 7.5     | 8.0     |
| $^1S_0-^1D_2$ | 2,015              | 1.41-02   | 1.41-02 | 1.41-02 | 1.41-02 | 1.41-02 | 1.41-02 | 1.42-02 | 1.46-02 | 1.56-02 | 1.84-02 | 2.47-02 | 3.89-02 | 7.14-02 |
| $^1G_4-^3F_3$ | 3,587              | 3.56-01   | 3.56-01 | 3.56-01 | 3.56-01 | 3.56-01 | 3.56-01 | 3.55-01 | 3.54-01 | 3.52-01 | 3.42-01 | 3.06-01 | 2.43-01 | 1.92-01 |
| $^1G_4-^3F_4$ | 3,759              | 4.98-01   | 4.98-01 | 4.98-01 | 4.98-01 | 4.98-01 | 4.98-01 | 4.97-01 | 4.95-01 | 4.92-01 | 4.79-01 | 4.28-01 | 3.40-01 | 2.69-01 |
| $^3P_2-^3F_2$ | 4,699              | 1.59-01   | 1.59-01 | 1.59-01 | 1.59-01 | 1.60-01 | 1.63-01 | 1.72-01 | 1.90-01 | 2.07-01 | 1.99-01 | 1.53-01 | 9.99-02 | 7.00-02 |
| $^3P_1-^3F_2$ | 4,893              | 1.53-01   | 1.53-01 | 1.53-01 | 1.53-01 | 1.52-01 | 1.50-01 | 1.45-01 | 1.30-01 | 1.03-01 | 6.80-02 | 3.76-02 | 2.02-02 | 1.29-02 |
| $^3P_2-^3F_3$ | 4,942              | 6.03-02   | 6.04-02 | 6.04-02 | 6.05-02 | 6.10-02 | 6.22-02 | 6.56-02 | 7.24-02 | 7.90-02 | 7.57-02 | 5.81-02 | 3.81-02 | 2.66-02 |
| $^3P_0-^3F_2$ | 4,989              | 2.68-01   | 2.68-01 | 2.67-01 | 2.67-01 | 2.64-01 | 2.55-01 | 2.33-01 | 1.87-01 | 1.26-01 | 7.20-02 | 3.64-02 | 1.88-02 | 1.18-02 |
| $^3P_1-^3F_3$ | 5,159              | 2.21-01   | 2.20-01 | 2.20-01 | 2.20-01 | 2.19-01 | 2.16-01 | 2.08-01 | 1.88-01 | 1.49-01 | 9.78-02 | 5.41-02 | 2.91-02 | 1.86-02 |
| $^3P_2-^3F_4$ | 5,276              | 5.96-02   | 5.96-02 | 5.96-02 | 5.98-02 | 6.02-02 | 6.14-02 | 6.48-02 | 7.15-02 | 7.80-02 | 7.48-02 | 5.74-02 | 3.76-02 | 2.63-02 |
| $^1D_2-^3F_2$ | 5,721              | 1.00+00   | 1.00+00 | 1.00+00 | 1.00+00 | 1.00+00 | 1.00+00 | 1.00+00 | 1.00+00 | 1.00+00 | 1.00+00 | 1.00+00 | 1.00+00 | 1.00+00 |
| $^1D_2-^3F_3$ | 6,087              | 1.74-01   | 1.74-01 | 1.74-01 | 1.74-01 | 1.74-01 | 1.74-01 | 1.74-01 | 1.74-01 | 1.74-01 | 1.74-01 | 1.74-01 | 1.74-01 | 1.74-01 |
| $^1D_2-^3F_4$ | 6,601              | 3.71-04   | 3.71-04 | 3.70-04 | 3.71-04 | 3.71-04 | 3.71-04 | 3.71-04 | 3.71-04 | 3.71-04 | 3.71-04 | 3.71-04 | 3.71-04 | 3.71-04 |
| $^3P_2-^1D_2$ | 2.63 $\mu\text{m}$ | 3.11-02   | 3.11-02 | 3.11-02 | 3.12-02 | 3.14-02 | 3.21-02 | 3.38-02 | 3.73-02 | 4.07-02 | 3.90-02 | 2.99-02 | 1.96-02 | 1.37-02 |
| $^3P_1-^1D_2$ | 3.39 $\mu\text{m}$ | 2.52-02   | 2.52-02 | 2.52-02 | 2.52-02 | 2.51-02 | 2.48-02 | 2.38-02 | 2.15-02 | 1.70-02 | 1.12-02 | 6.19-03 | 3.34-03 | 2.13-03 |
| $^3F_4-^3F_3$ | 7.81 $\mu\text{m}$ | 2.24-01   | 2.24-01 | 2.24-01 | 2.24-01 | 2.25-01 | 2.29-01 | 2.32-01 | 2.12-01 | 1.44-01 | 6.88-02 | 2.82-02 | 1.23-02 | 7.00-03 |
| $^3F_3-^3F_2$ | 9.51 $\mu\text{m}$ | 7.15-01   | 7.15-01 | 7.13-01 | 7.08-01 | 6.93-01 | 6.48-01 | 5.35-01 | 3.33-01 | 1.41-01 | 4.75-02 | 1.62-02 | 6.52-03 | 3.52-03 |

Line intensities (in energy units) are given relative to  $I(5,721 \text{ \AA}) = 1.00$ . A + or - B implies  $A \times 10^{\pm B}$ .

**Table 10. Emission line ratios for transitions among the  $3d^2$  levels of Fe VII at  $T_e = 30,000\text{K}$** 

| Transition    | Wavelength,<br>Å   | Log $N_e$ |         |         |         |         |         |         |         |         |         |         |         |         |
|---------------|--------------------|-----------|---------|---------|---------|---------|---------|---------|---------|---------|---------|---------|---------|---------|
|               |                    | 2.0       | 2.5     | 3.0     | 3.5     | 4.0     | 4.5     | 5.0     | 5.5     | 6.0     | 6.5     | 7.0     | 7.5     | 8.0     |
| $^1S_0-^1D_2$ | 2,015              | 2.09-02   | 2.09-02 | 2.09-02 | 2.09-02 | 2.09-02 | 2.10-02 | 2.12-02 | 2.18-02 | 2.34-02 | 2.77-02 | 3.75-02 | 5.90-02 | 1.08-01 |
| $^1G_4-^3F_3$ | 3,587              | 4.16-01   | 4.16-01 | 4.16-01 | 4.16-01 | 4.15-01 | 4.15-01 | 4.15-01 | 4.14-01 | 4.11-01 | 3.99-01 | 3.56-01 | 2.80-01 | 2.19-01 |
| $^1G_4-^3F_4$ | 3,759              | 5.81-01   | 5.82-01 | 5.82-01 | 5.81-01 | 5.81-01 | 5.81-01 | 5.80-01 | 5.79-01 | 5.75-01 | 5.58-01 | 4.98-01 | 3.92-01 | 3.06-01 |
| $^3P_2-^3F_2$ | 4,699              | 1.70-01   | 1.70-01 | 1.70-01 | 1.70-01 | 1.71-01 | 1.75-01 | 1.83-01 | 2.01-01 | 2.19-01 | 2.11-01 | 1.64-01 | 1.07-01 | 7.40-02 |
| $^3P_1-^3F_2$ | 4,893              | 1.60-01   | 1.60-01 | 1.60-01 | 1.60-01 | 1.59-01 | 1.57-01 | 1.52-01 | 1.38-01 | 1.11-01 | 7.36-02 | 4.08-02 | 2.18-02 | 1.37-02 |
| $^3P_2-^3F_3$ | 4,942              | 6.47-02   | 6.47-02 | 6.47-02 | 6.49-02 | 6.53-02 | 6.65-02 | 6.97-02 | 7.64-02 | 8.33-02 | 8.05-02 | 6.24-02 | 4.08-02 | 2.82-02 |
| $^3P_0-^3F_2$ | 4,989              | 2.77-01   | 2.77-01 | 2.77-01 | 2.76-01 | 2.74-01 | 2.66-01 | 2.44-01 | 1.99-01 | 1.36-01 | 7.82-02 | 3.95-02 | 2.01-02 | 1.24-02 |
| $^3P_1-^3F_3$ | 5,159              | 2.30-01   | 2.30-01 | 2.30-01 | 2.30-01 | 2.29-01 | 2.27-01 | 2.19-01 | 1.99-01 | 1.60-01 | 1.06-01 | 5.88-02 | 3.13-02 | 1.97-02 |
| $^3P_2-^3F_4$ | 5,276              | 6.39-02   | 6.39-02 | 6.40-02 | 6.41-02 | 6.45-02 | 6.57-02 | 6.89-02 | 7.55-02 | 8.23-02 | 7.95-02 | 6.17-02 | 4.03-02 | 2.78-02 |
| $^1D_2-^3F_2$ | 5,721              | 1.00+00   | 1.00+00 | 1.00+00 | 1.00+00 | 1.00+00 | 1.00+00 | 1.00+00 | 1.00+00 | 1.00+00 | 1.00+00 | 1.00+00 | 1.00+00 | 1.00+00 |
| $^1D_2-^3F_3$ | 6,087              | 1.74-01   | 1.74-01 | 1.74-01 | 1.74-01 | 1.74-01 | 1.74-01 | 1.74-01 | 1.74-01 | 1.74-01 | 1.74-01 | 1.74-01 | 1.74-01 | 1.74-01 |
| $^1D_2-^3F_4$ | 6,601              | 3.71-04   | 3.71-04 | 3.71-04 | 3.71-04 | 3.71-04 | 3.71-04 | 3.71-04 | 3.71-04 | 3.71-04 | 3.71-04 | 3.71-04 | 3.71-04 | 3.71-04 |
| $^3P_2-^1D_2$ | 2.63 $\mu\text{m}$ | 3.33-02   | 3.33-02 | 3.34-02 | 3.34-02 | 3.36-02 | 3.43-02 | 3.59-02 | 3.94-02 | 4.29-02 | 4.15-02 | 3.22-02 | 2.10-02 | 1.45-02 |
| $^3P_1-^1D_2$ | 3.39 $\mu\text{m}$ | 2.64-02   | 2.64-02 | 2.64-02 | 2.63-02 | 2.62-02 | 2.59-02 | 2.51-02 | 2.28-02 | 1.83-02 | 1.21-02 | 6.73-03 | 3.59-03 | 2.25-03 |
| $^3F_4-^3F_3$ | 7.81 $\mu\text{m}$ | 1.92-01   | 1.92-01 | 1.93-01 | 1.93-01 | 1.94-01 | 1.96-01 | 1.98-01 | 1.84-01 | 1.28-01 | 6.27-02 | 2.58-02 | 1.12-02 | 6.20-03 |
| $^3F_3-^3F_2$ | 9.51 $\mu\text{m}$ | 6.01-01   | 6.01-01 | 6.00-01 | 5.96-01 | 5.84-01 | 5.50-01 | 4.61-01 | 2.97-01 | 1.30-01 | 4.43-02 | 1.50-02 | 5.91-03 | 3.10-03 |

Line intensities (in energy units) are given relative to  $I(5,721 \text{ \AA}) = 1.00$ . A + or - B implies  $A \times 10^{\pm B}$ .
